# Supplementary material for: Large fluctuations at the lasing threshold of solid- and liquid-state dye lasers
Source: PubMed Central journal article supplement (PMC4997259; doi:10.1038/srep32134), 2016-08-25
Supplement: srep32134-s1.pdf [file srep32134-s1.pdf]

# Large fluctuations at the lasing threshold of solid- and liquid-state dye lasers

Supratim Basak, Alvaro Blanco, Cefe López\*

## Supplementary Information

**S1-Experimental setup** (see experimental section for specific details for every element). Briefly, two collinear lasers (ps and ns pulse duration) can be selected for every measurement. Both lasing and no-lasing events can be seen in Figure S1. Images a) and b) captured by the CCD camera show lasing and non-lasing events taken at the same pumping conditions with successive pulses. While a) shows a bright red spot corresponding to an intense narrow emission event, image b) only shows green stray light from the pumping laser.

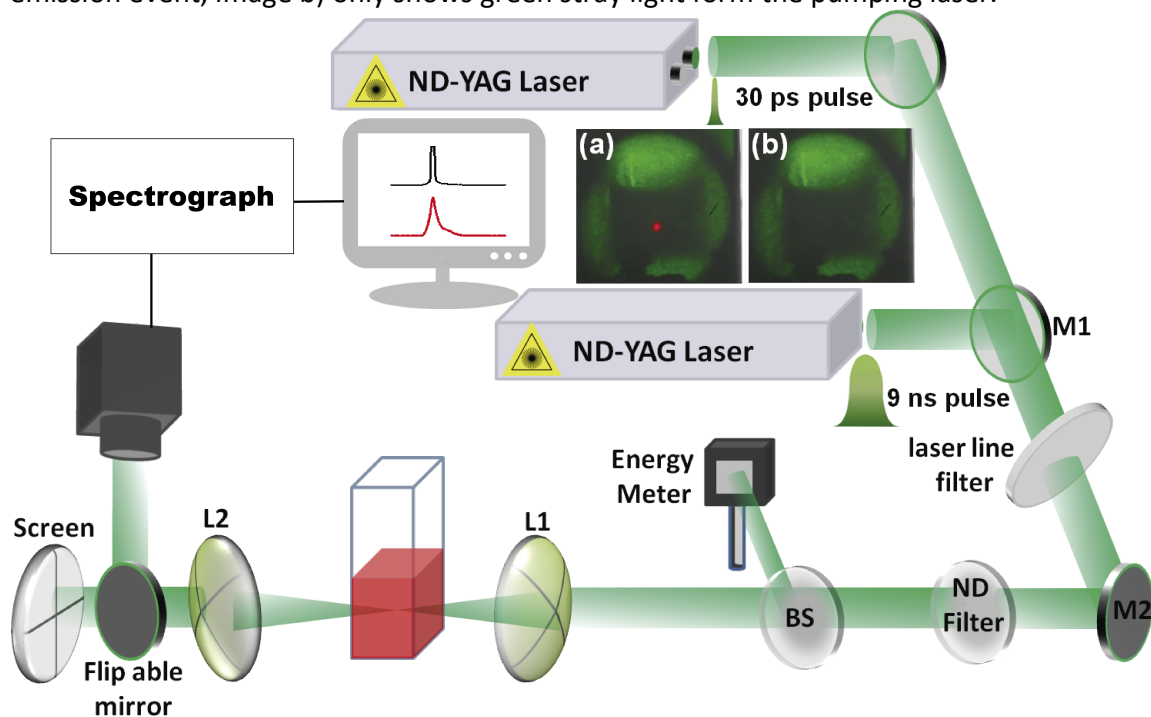

**Figure S1** | Experimental set up. The pulse lasers for *nano* (pulse duration=9 ns) or *pico* (pulse duration=30 ps) pumping are sent on the same beamline.

**S2-Pumping-Signal Cross Correlation Analysis.** The cross correlation  $c(l) = \frac{\langle I_i \times P_{i-l} \rangle}{\sqrt{\langle I_i^2 \rangle} \sqrt{\langle P_i^2 \rangle}}$  between intensity and pump energy shows a clear difference between on-threshold and off-threshold as seen in Figure S2. Note that this magnitude represents how the energy of a pulse is related to the lasing produced by preceding pulses.

For on-threshold conditions the overall values are mostly below 0.6 whereas for off-threshold the correlation is almost perfect reaching values very close to unity. The number of data points considered in the calculation  $N_s - l$  decreases as the lag ( $l$ ) approaches  $N_s$  the number of shots. In fact when the lag is equal to the number of points only one pair is considered which yields a correlation of one. Off-threshold the high degree of correlation even for non-zero lag only highlights the stability of the systems because if the pump laser had a significant power drift it would appear as a poor cross correlation.

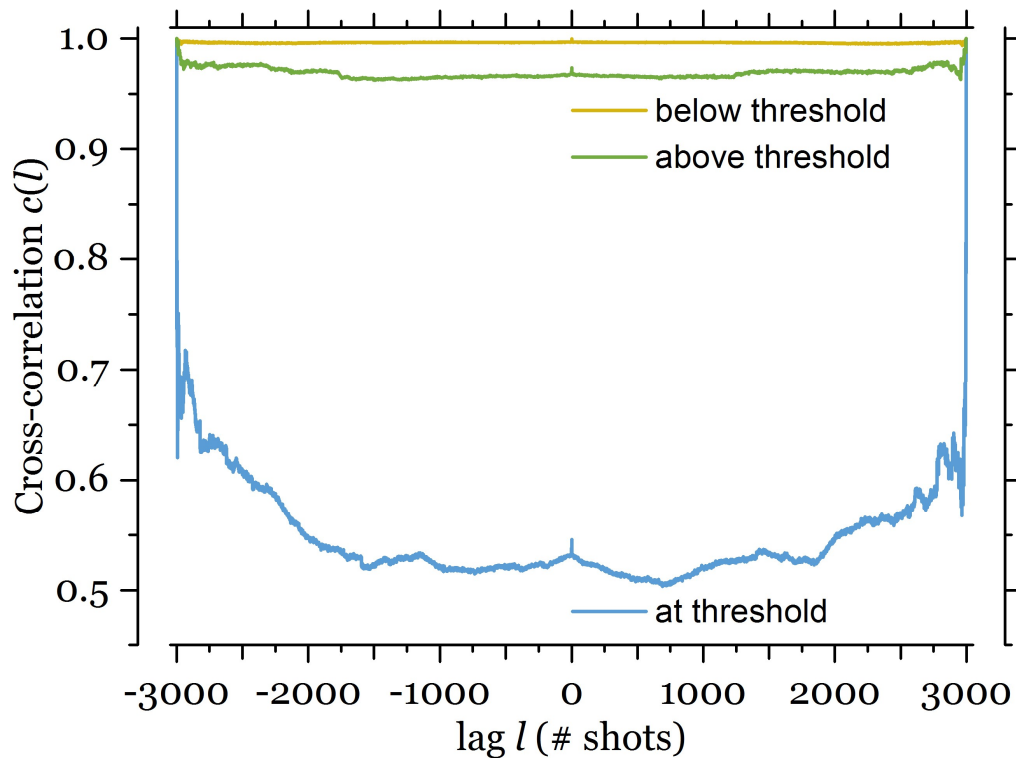

**Figure S2** | Normalized cross correlation versus lag position of the two above shown signal.

**S3- Dye concentration** Next experiment is meant to rule out dye concentration effects other than threshold changes.

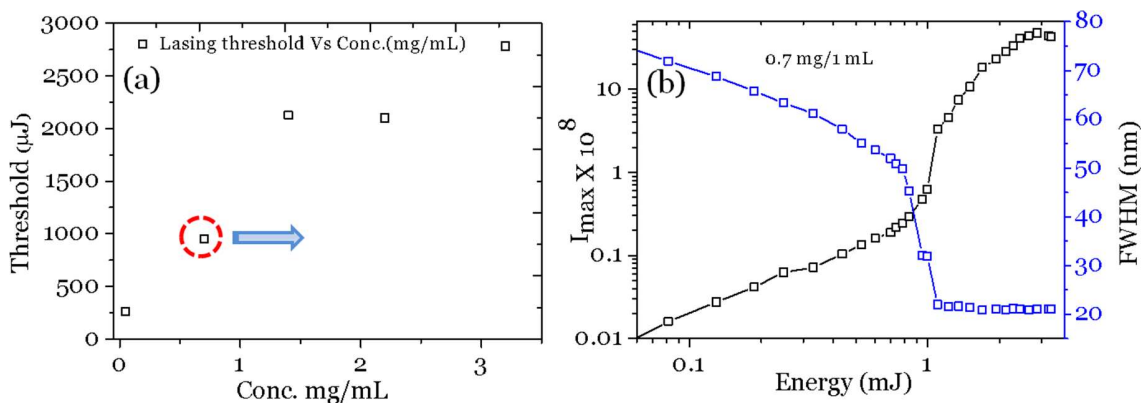

**Figure S3 | a**, Lasing threshold vs. concentration in  $\text{mg/mL}$  prepared in THF solvent. **b**, The corresponding  $I_{\text{max}}$ /FWHM vs. pump energy for the trace surrounded by red dotted circle in **a**.

**S4-Solid State Samples** Thin solid-state samples were pumped and proved much less fluctuating behaviour, as shown in the example in Figure S4

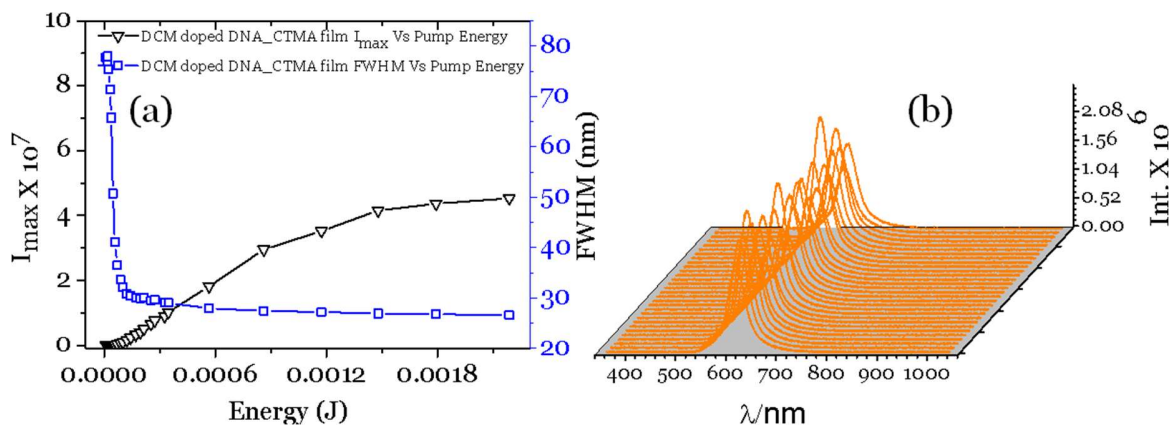

**Figure S4 | a**, Intensity (black square) and corresponding (FWHM) from the solid state laser as a function of the pump energy. **b**, Series of photoluminescence spectra obtained from the solid state laser in successive excitation shots at threshold.

**S5- Fluctuation coefficient at threshold** does not follow the Gaussian distribution and U-quadratic is used to fit the results as shown in figure S5.

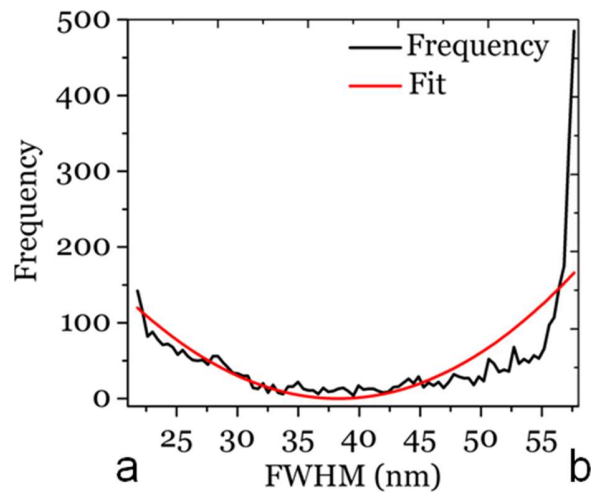

**Figure S5 |** Fitting of Fig. 3(c) with U-quadratic distribution function

**Note:** The probability distribution function  $F = \alpha(x - \beta)^2$ , where  $\beta = \frac{a+b}{2}$  and  $\alpha = \frac{12}{(b-a)^3}$ .  $a$  and  $b$  are the point on the x-axis corresponds to the maximum frequency. The values obtained from the fit are  $\alpha = 0.44$  and  $\beta = 38$ .

**S6-lasing subset analysis.** We carried out an analysis of overlap in the threshold by separating the spectra in lasing and non-lasing sets prior to performing the overlap analysis. The results indicate that in the threshold those shots that result in intense, narrow peaks present single-valued overlap distributions concentrated around  $\pm 1$ ; corresponding to RS situation like in the third panel in Figure 4 upper row; whereas shots that generate weak, broad emission peaks present the statistics of a RS system like first and fifth panels albeit with a narrower range around zero.

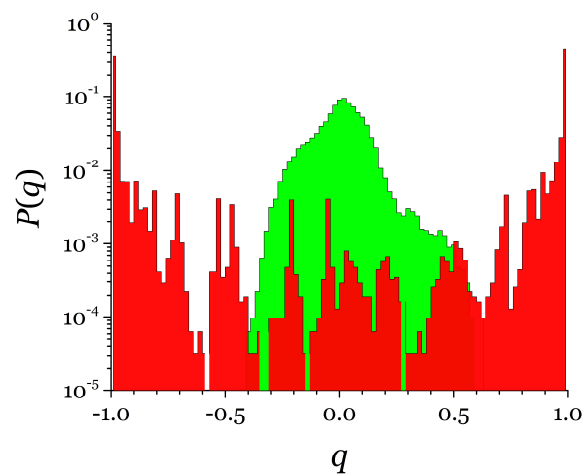

**Figure S6** | Statistical distribution of correlations in separate sets of shots. Red (green) histogram represents distribution of overlaps among shots that produce (non-)lasing spectra.
